# Supplementary material for: Lineage-Specific Conserved Noncoding Sequences of Plant Genomes: Their Possible Role in Nucleosome Positioning
Source: PubMed Central journal article supplement (PMC4202324; doi:10.1093/gbe/evu188), 2014-09-05
Supplement: supp_evu188_Hettiarachchi_Suppl_Figs_Tabs.pdf [file supp_evu188_Hettiarachchi_Suppl_Figs_Tabs.pdf]

**Supplementary figure 1:** Length and conservation level relationship for lineage specific CNSs.

(A) Length and conservation level for grass specific CNSs. (B) Length and conservation level for monocot specific CNSs. (C) Length and conservation level for dicot specific CNSs. (D) Length and conservation level for angiosperm specific CNSs.

(A)

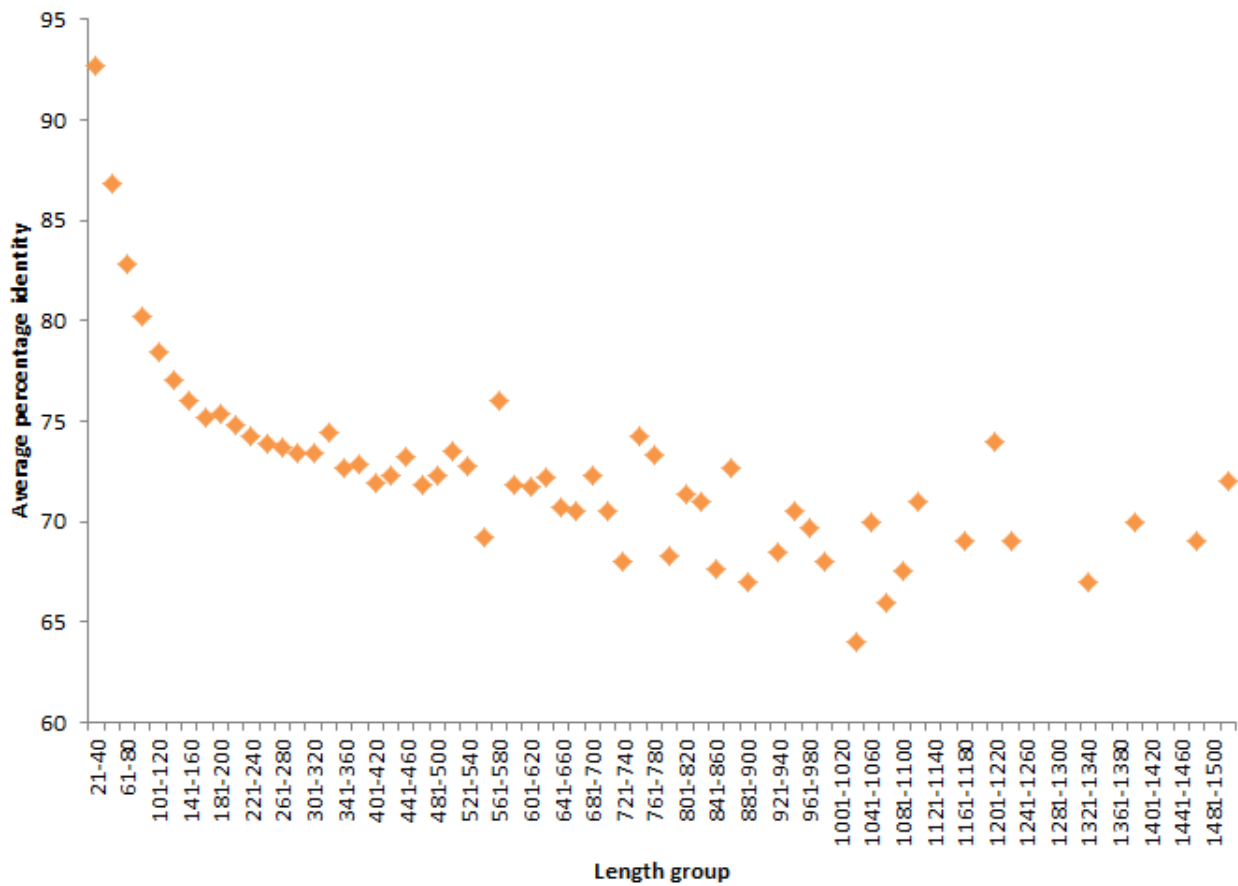

(B)

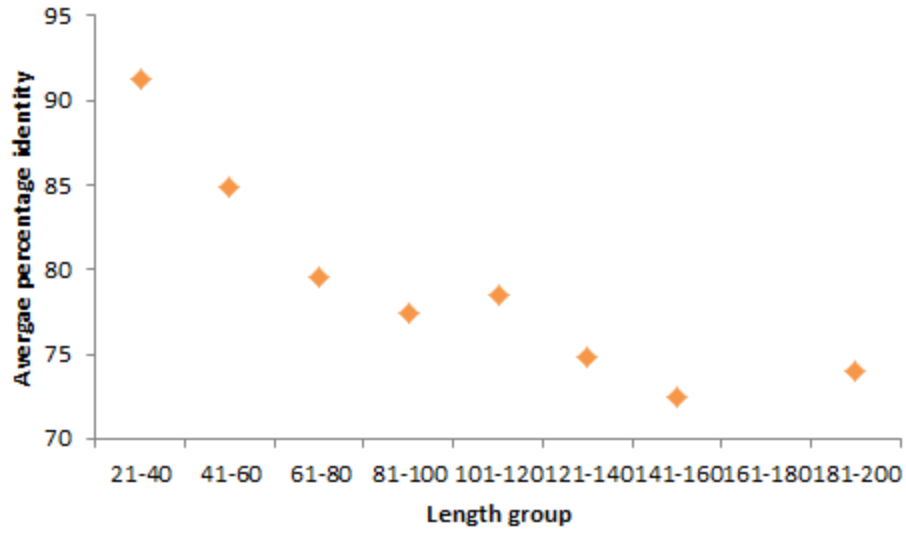

(C)

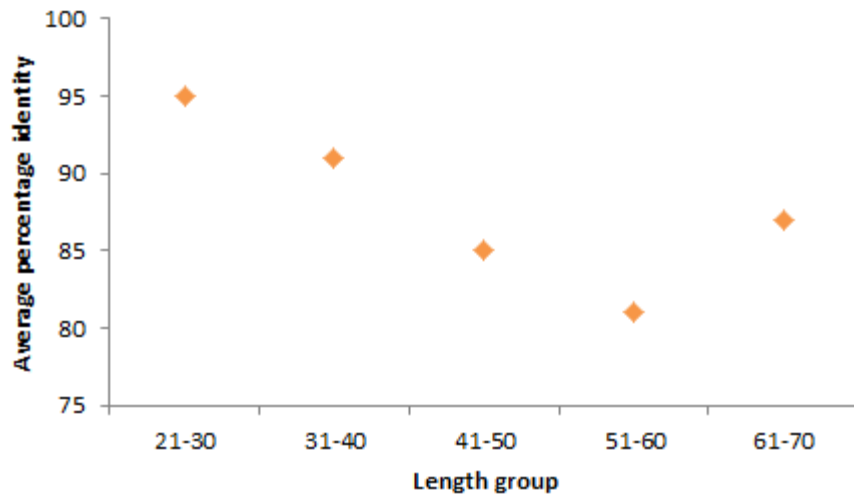

(D)

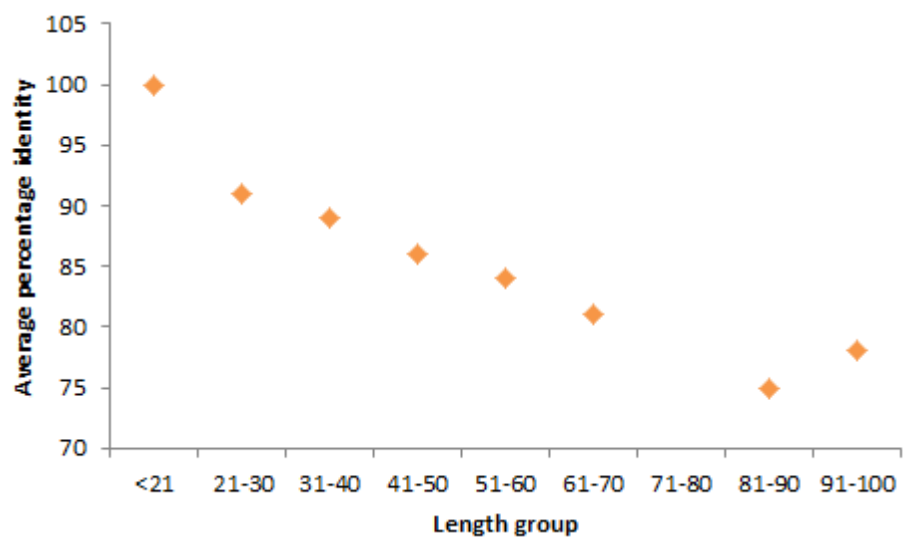



**Supplementary figure 3:** Distribution of grass specific CNSs on *O.sativa japonica* chromosomes. Y axis – genomic location of the CNSs (Mb), X axis – cumulative frequency of the CNSs. The clearly visible clusters of CNSs are encircled.

**Chromosome 1**

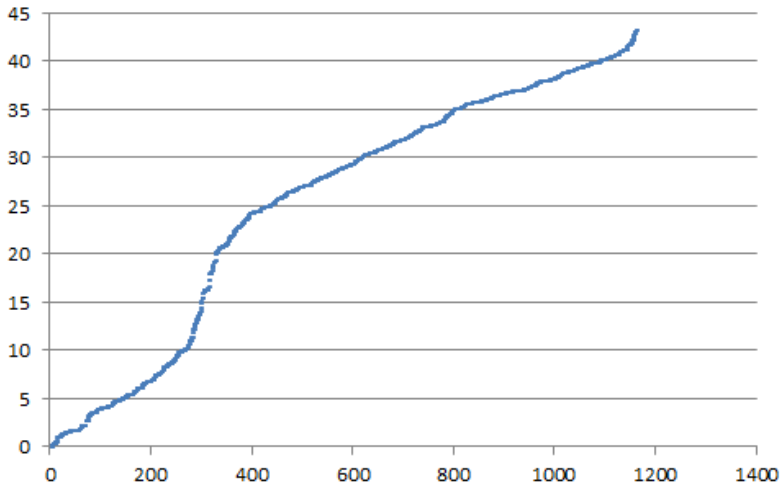

**Chromosome 2**

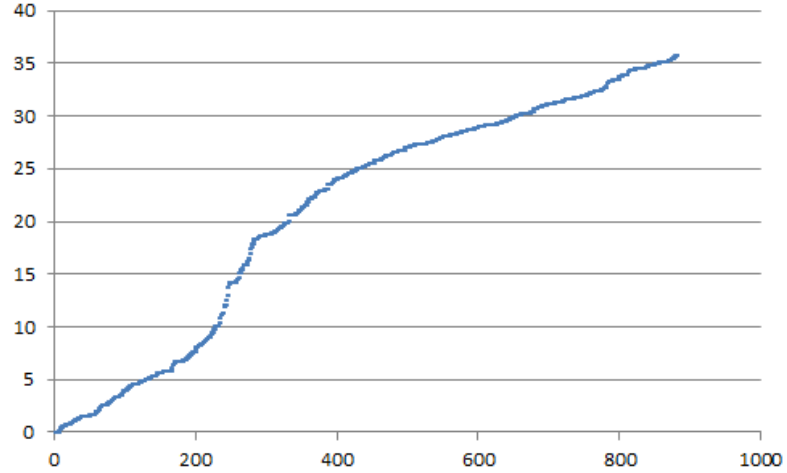

**Chromosome 3**

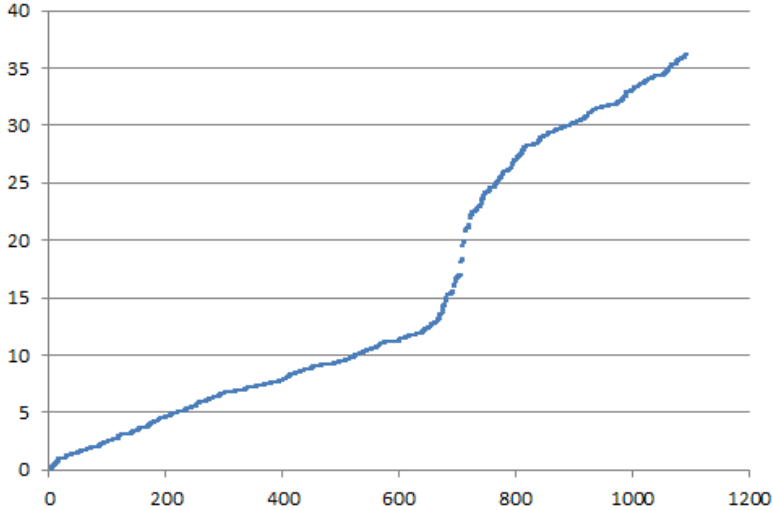

**Chromosome 4**

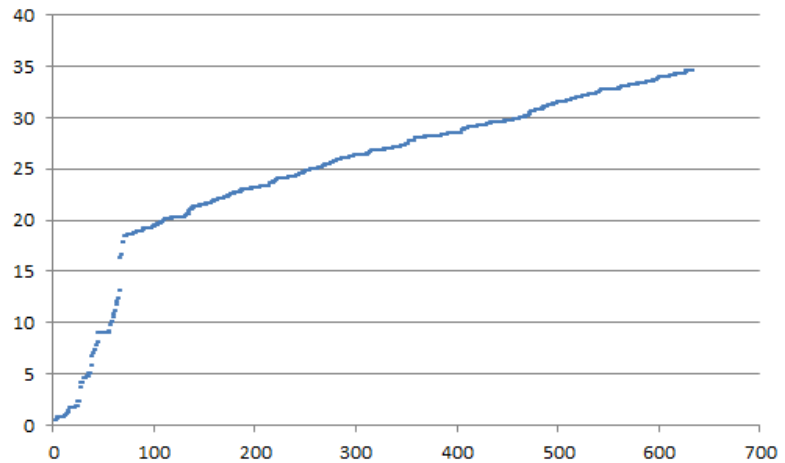

**Chromosome 5**

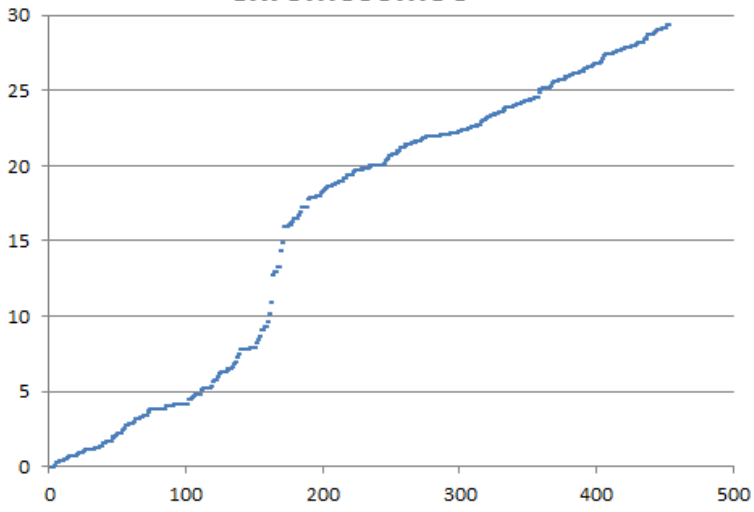

**Chromosome 6**

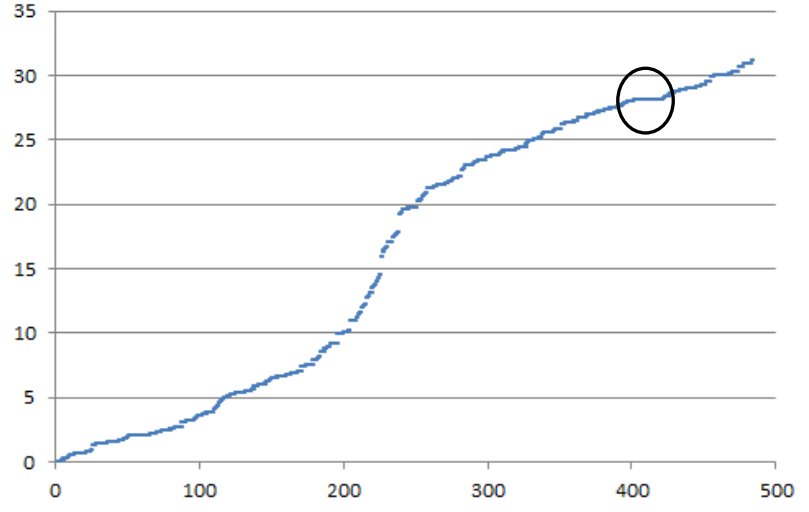

**Chromosome 7**

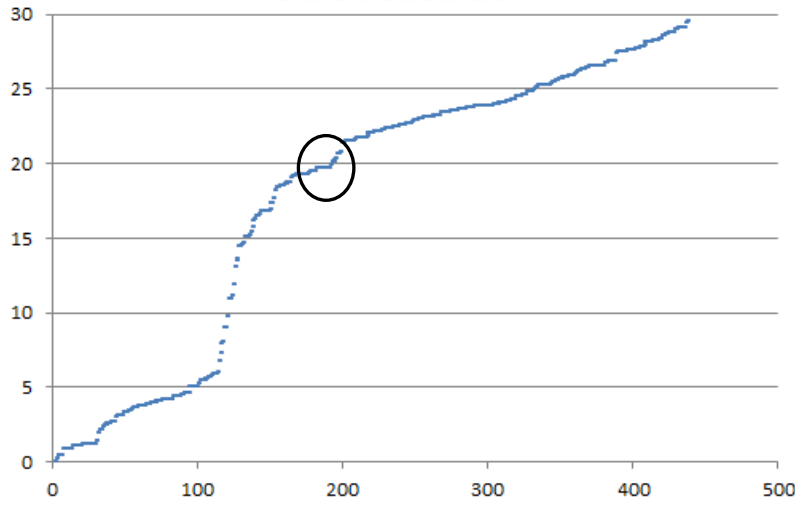

**Chromosome 8**

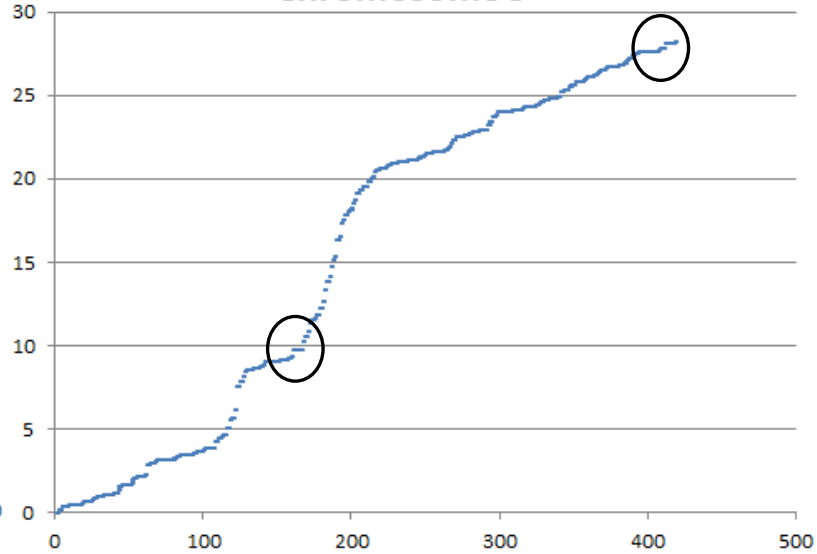

**Chromosome 9**

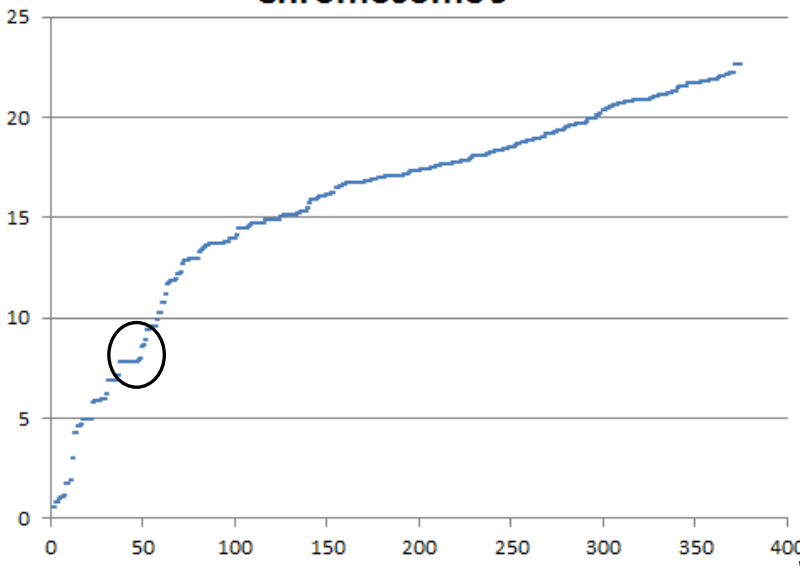

**Chromosome 10**

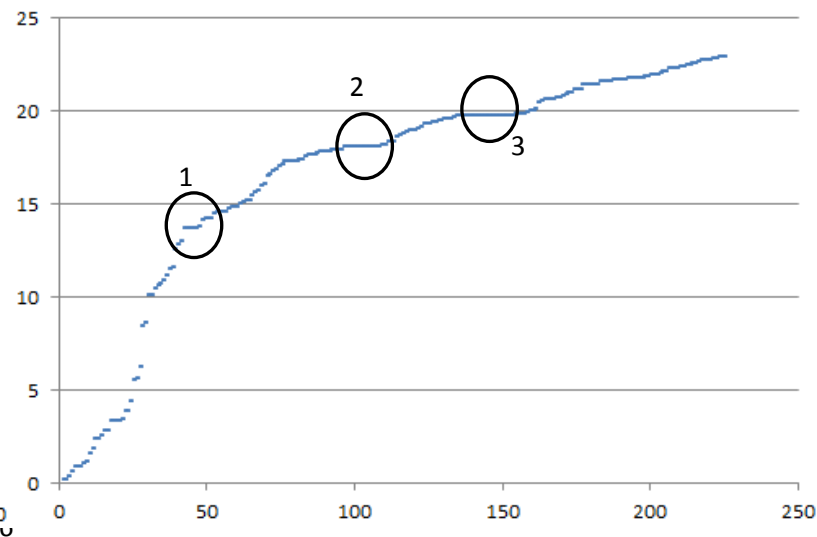

**Chromosome 11**

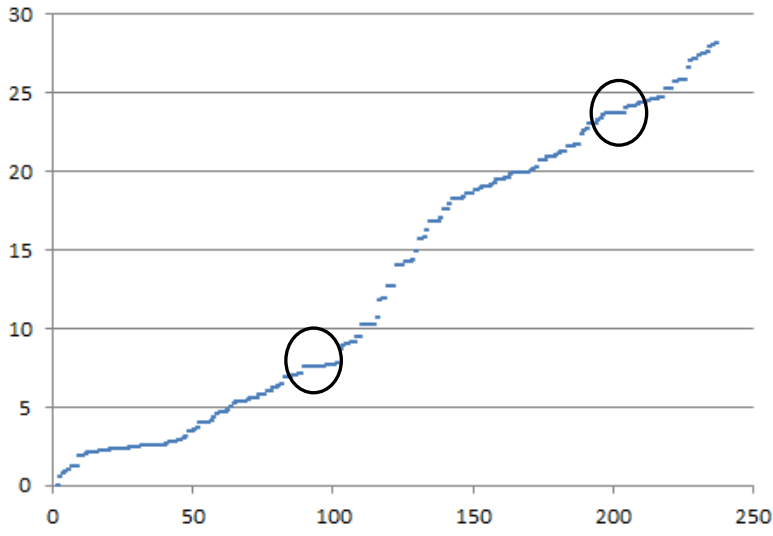

**Chromosome 12**

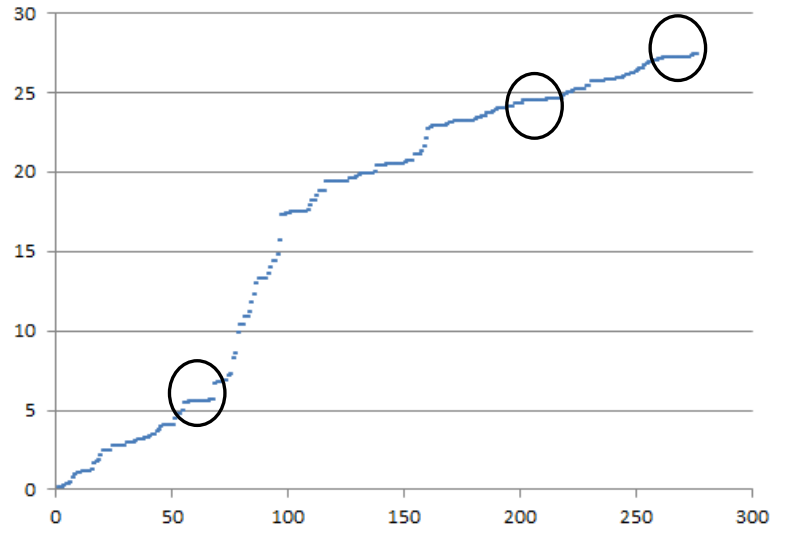

**Supplementary figure 4:** Distribution of monocot specific CNSs on *O.sativa japonica* chromosomes. Y axis – genomic location of the CNSs (Mb), X axis – cumulative frequency of the CNSs.

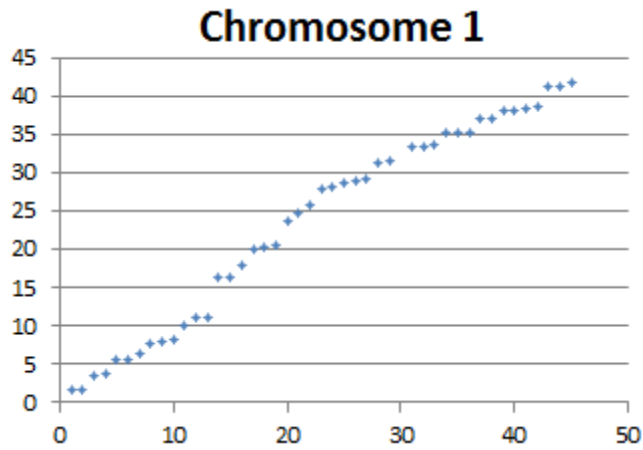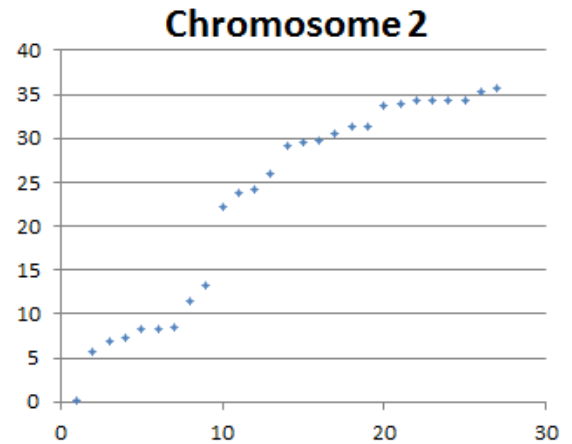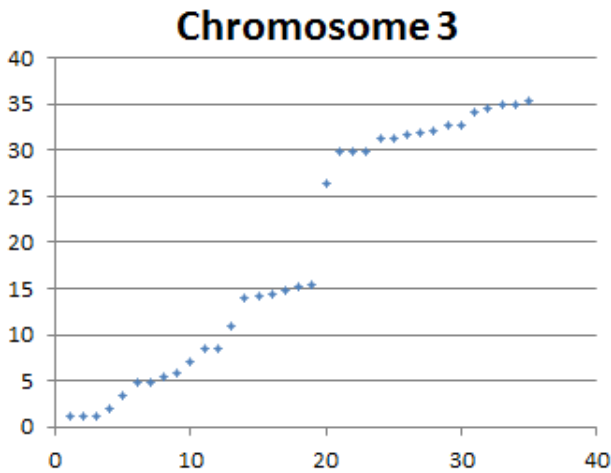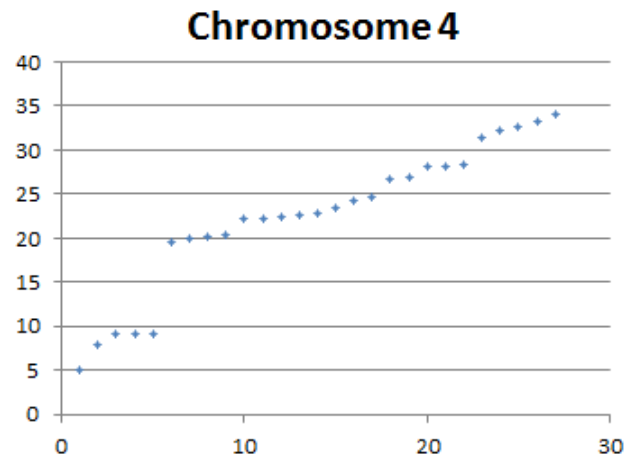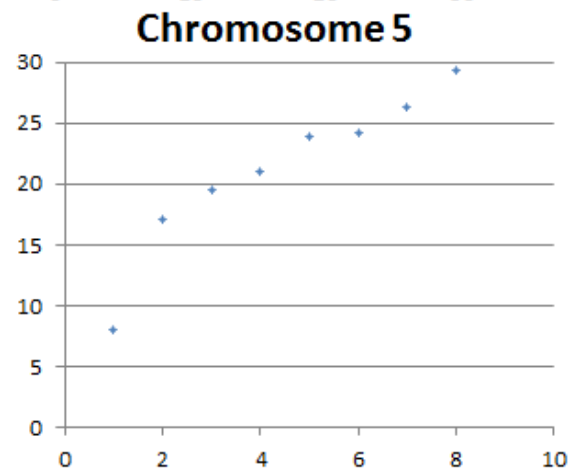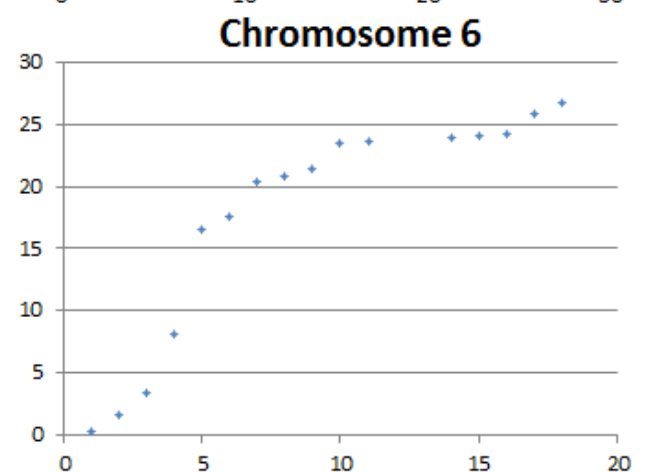



**Chromosome 7**

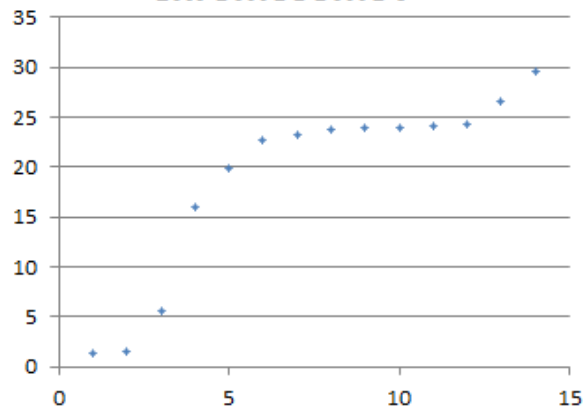

**Chromosome 8**

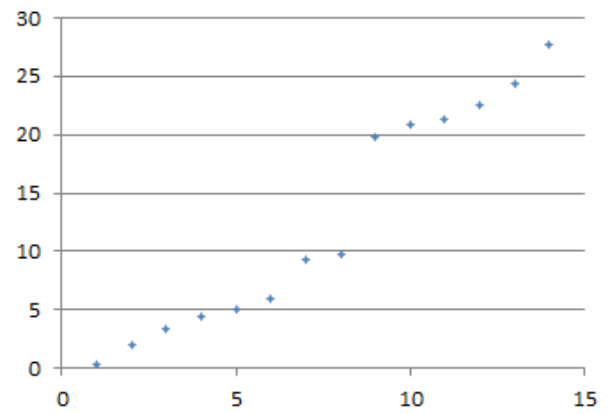

**Chromosome 9**

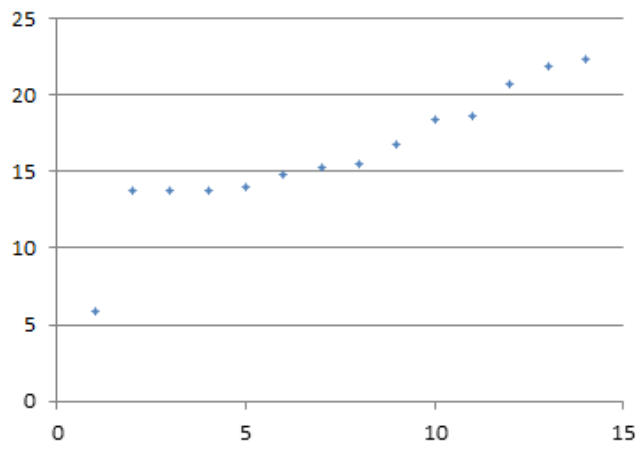

**Chromosome 10**

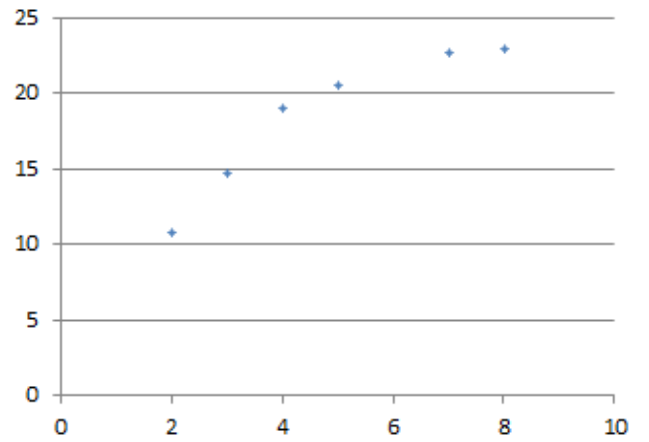

**Chromosome 11**

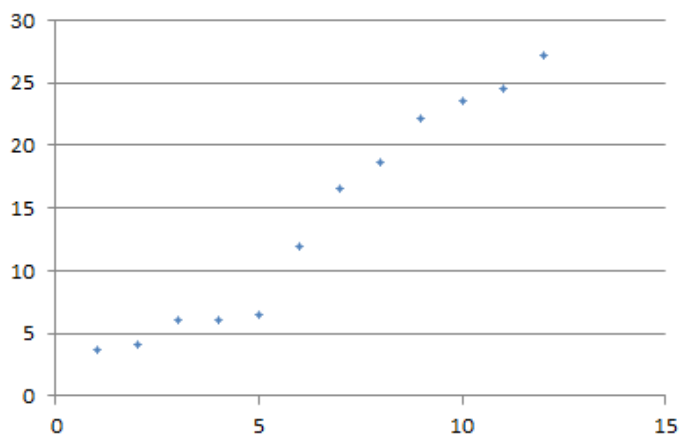

**Chromosome 12**

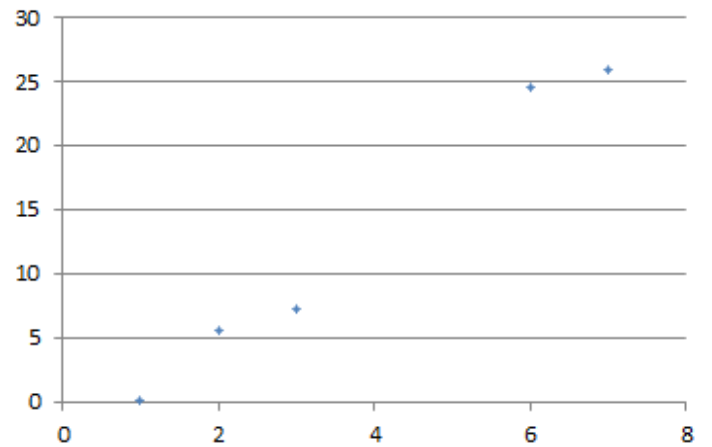

**Supplementary figure 5:** (A) Distribution of A+T content in the flanking regions and within monocot specific CNSs, black line – average A+T content in rice genome. (B) Nucleosome occupancy probability for monocot specific CNSs including flanking regions. 0<sup>th</sup> nucleotide position represents the center of each CNS and also that of the random samples. Blue, Red and green graphs respectively show nucleosome occupancy probabilities of the CNSs, random sample with same AT content as CNSs and the random sample without specific AT preference.

(A)

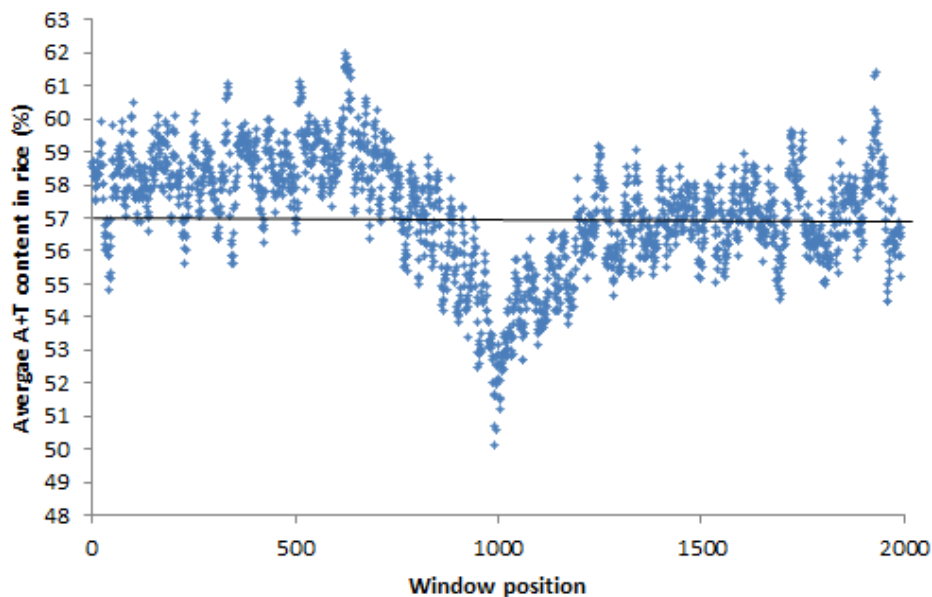

(B)

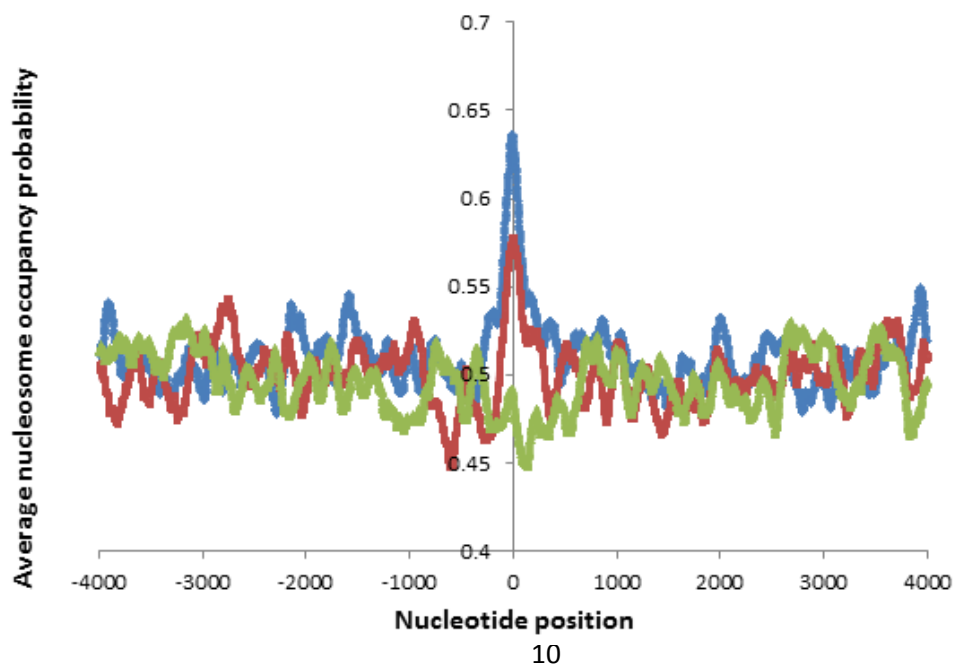

**Supplementary figure 6:** The phylogenetic trees of the CNSs. The concatenated lineage specific CNSs were used to construct the phylogenetic trees with neighbor-joining method. (A) Phylogenetic tree constructed for grasses with grass specific CNSs (B) Phylogenetic tree constructed for all monocots in the study with monocot specific CNSs. (C) Phylogenetic tree constructed for dicots in the study with dicot specific CNSs. (D) Phylogenetic tree constructed for all angiosperms in the study with angiosperm specific CNSs.

(A)

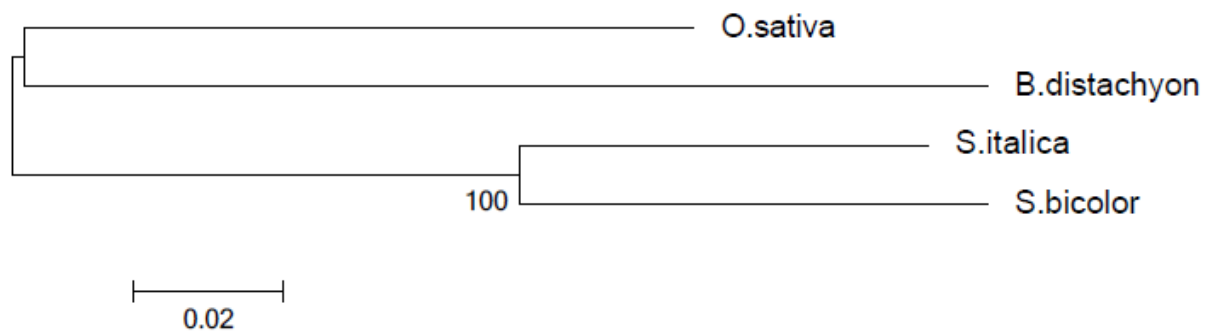

(B)

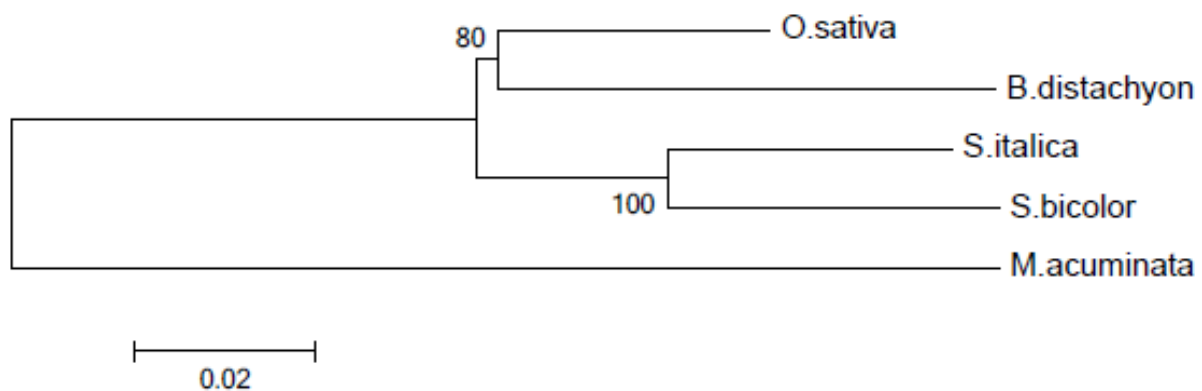

(C)

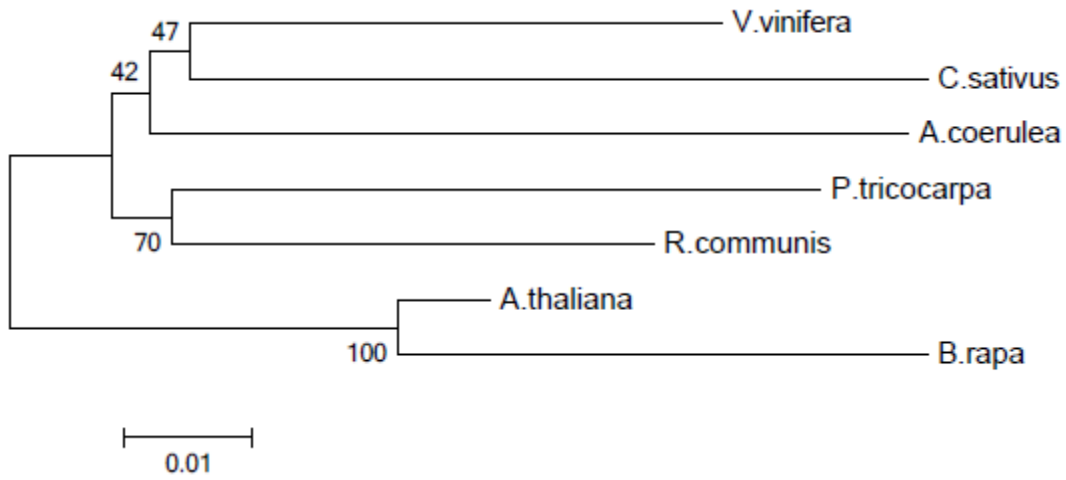

(D)

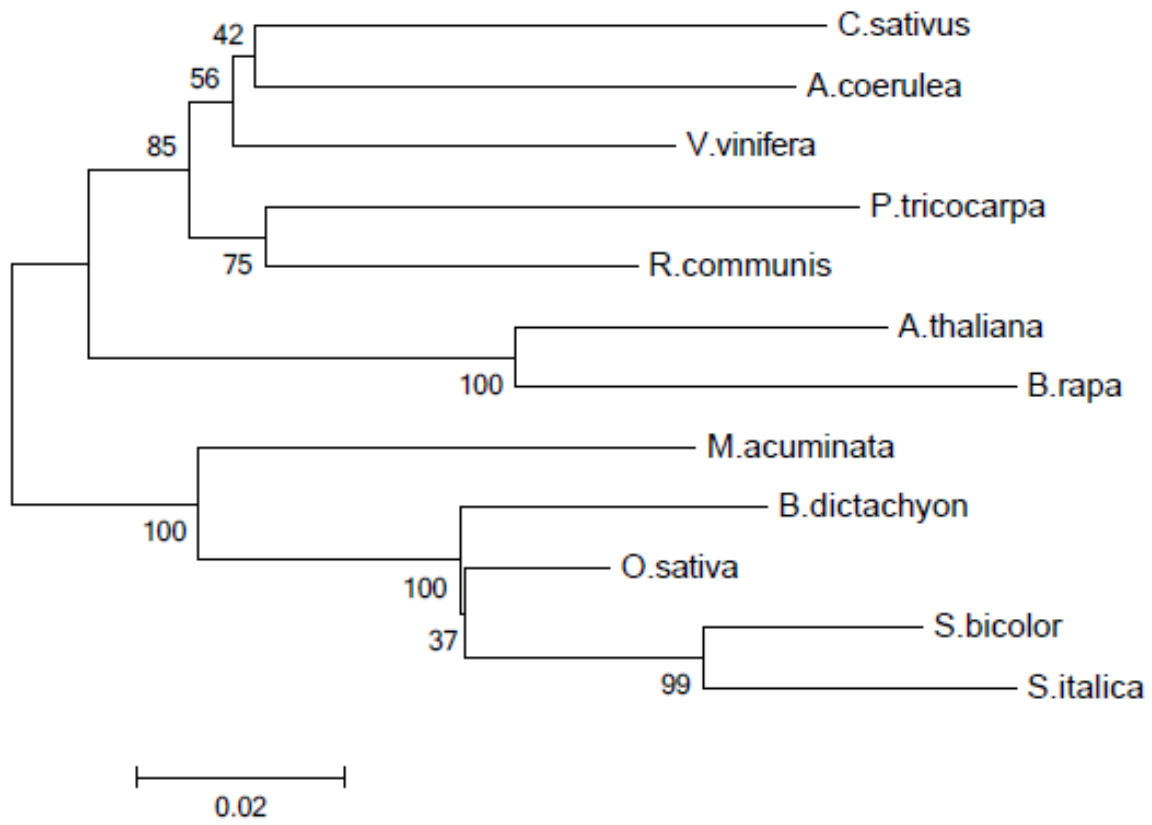

**Supplementary figure 7:** The phylogenetic tree for lineage common CNSs.

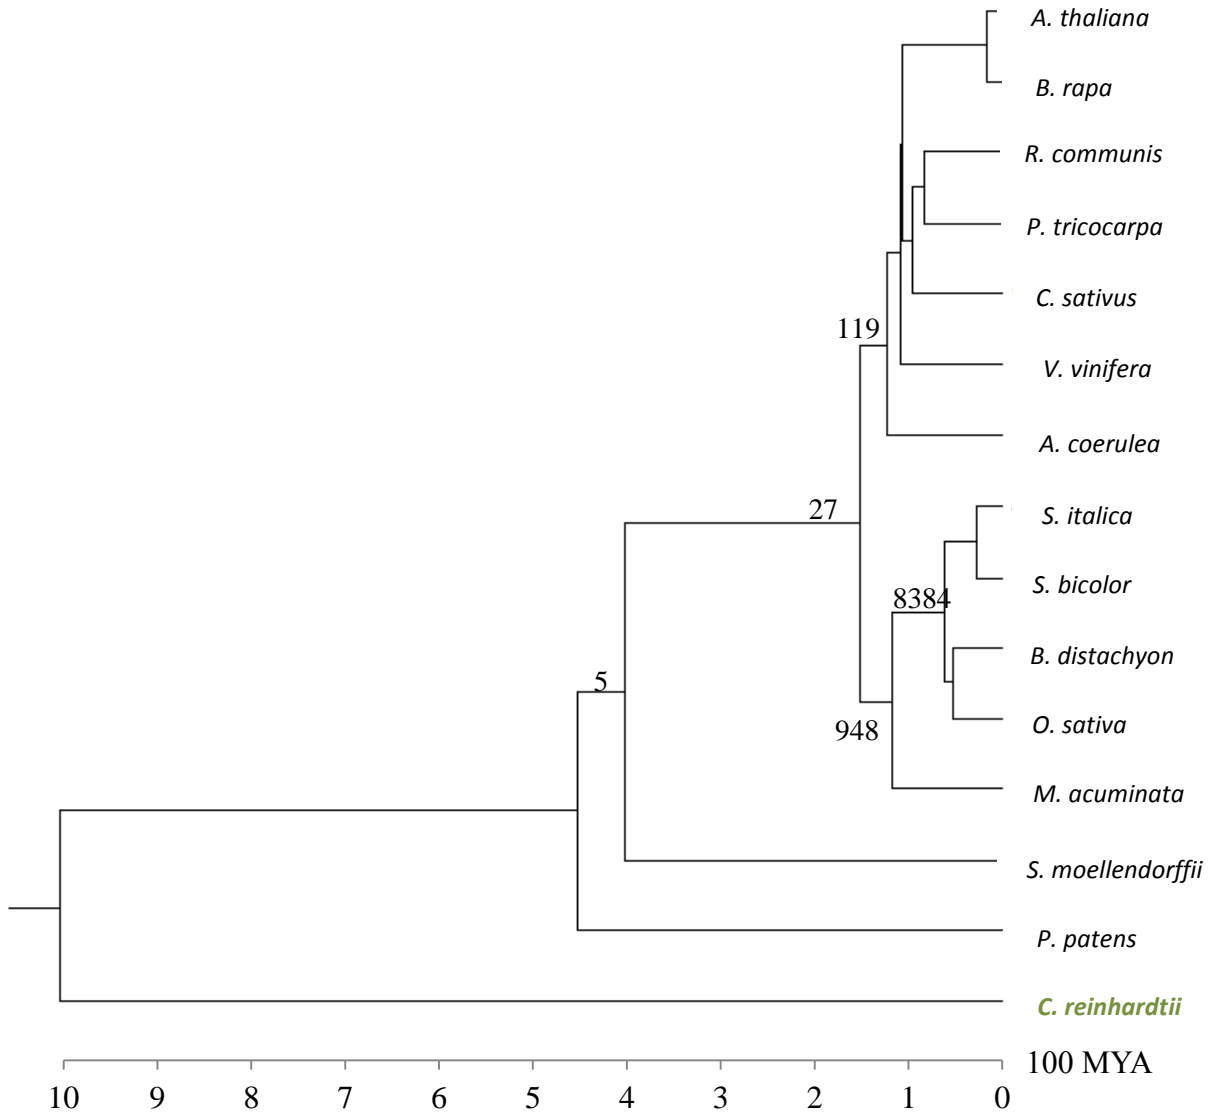

**Supplementary figure 8:** Nucleosome occupancy probability for grass specific UTR, Intergenic and Intronic CNSs. 0<sup>th</sup> nucleotide position represent the center of the CNSs. (A) Nucleosome occupancy probability for grass specific UTR CNSs. Purple, green and red graphs respectively show nucleosome occupancy probabilities of the 5' UTR CNSs, 3' UTR CNSs and random samples with same AT content as CNSs. (B) Nucleosome occupancy probability for grass specific intergenic CNSs. Blue and red graphs show the nucleosome probabilities for intergenic CNSs and random samples. (C) Nucleosome occupancy probability for grass specific intronic CNSs. Blue and red graphs show the nucleosome probabilities for intronic CNSs and random samples.

(A)

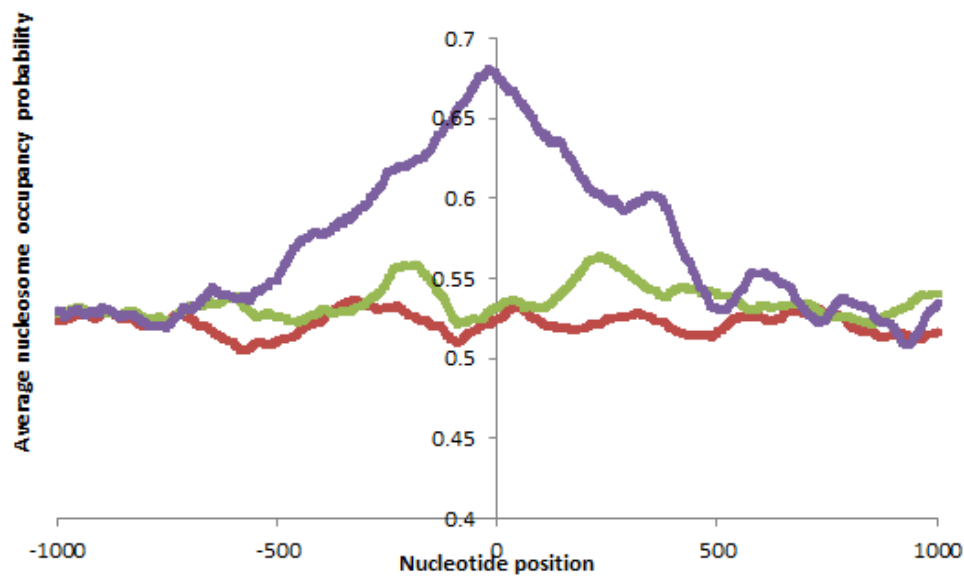

(B)

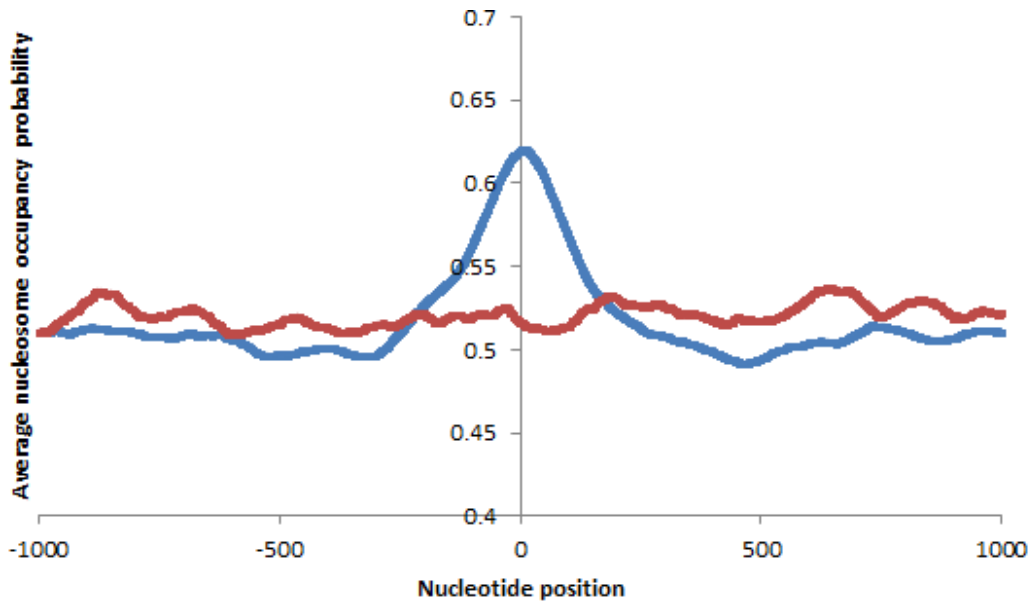

(C)

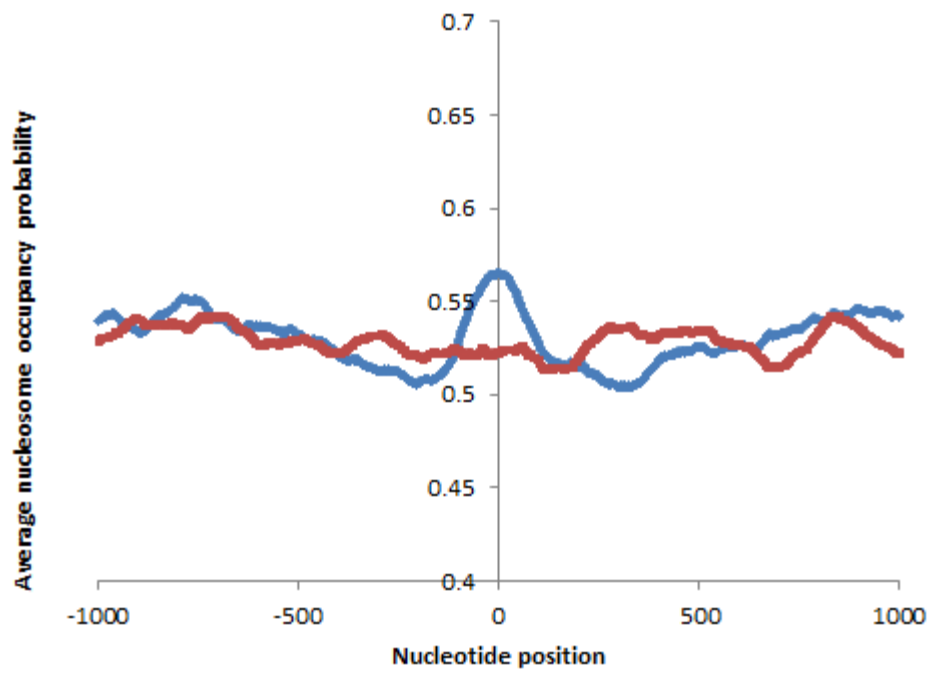

**Supplementary Table 1:** Numbers on ancestral CNSs found between *C. reinhardtii* and other species.

| Query                 | Subject                   | Number of ancestral CNSs |
|-----------------------|---------------------------|--------------------------|
| <i>C. reinhardtii</i> | <i>A. thaliana</i>        | 210                      |
|                       | <i>B. rapa</i>            | 368                      |
|                       | <i>R. communis</i>        | 649                      |
|                       | <i>P. tricornis</i>       | 677                      |
|                       | <i>C. sativus</i>         | 233                      |
|                       | <i>V. vinifera</i>        | 156                      |
|                       | <i>A. coerulea</i>        | 198                      |
|                       | <i>S. italica</i>         | 259                      |
|                       | <i>S. bicolor</i>         | 911                      |
|                       | <i>B. distachyon</i>      | 482                      |
|                       | <i>O. sativa japonica</i> | 708                      |
|                       | <i>M. acuminata</i>       | 1049                     |
|                       | <i>S. moellendorffii</i>  | 1741                     |
|                       | <i>P. patens</i>          | 958                      |



**Supplementary Table 2:** Gene enrichment analysis for 6536 random genes of *O. sativa japonica*

| Functional group                    | Percentage of genes in the group | P-value |
|-------------------------------------|----------------------------------|---------|
| Root hair cell differentiation      | 100.0                            | 1.7E-8  |
| Tricoblast maturation               | 100.0                            | 1.7E-8  |
| Cell maturation                     | 100.0                            | 1.7E-8  |
| Trichoblast differentiation         | 100.0                            | 2.2E-8  |
| Root epidermal cell differentiation | 100.0                            | 3.3E-8  |
| Developmental maturation            | 100.0                            | 3.8E-8  |
| Epidermal cell differentiation      | 100.0                            | 5.1E-7  |
| Cell growth                         | 75.0                             | 6.9E-4  |
| Regulation of cell size             | 75.0                             | 7.7E-4  |
| Growth                              | 75.0                             | 9.1E-4  |
| Cell tip growth                     | 50.0                             | 1.5E-2  |
| Leaf morphogenesis                  | 50.0                             | 2.3E-2  |
| Shoot morphogenesis                 | 50.0                             | 3.2E-2  |
| Leaf development                    | 50.0                             | 3.9E-2  |
| Glycoprotein                        | 50.0                             | 4.0E-2  |
| Phyllome development                | 50.0                             | 4.3E-2  |
| Shoot development                   | 50.0                             | 5.9E-2  |
| Post embryonic development          | 25.0                             | 1.0E-0  |
| GPI-anchor                          | 25.0                             | 1.0E-0  |
| Endomembrane system                 | 25.0                             | 1.0E-0  |

**Supplementary Table 3:** (A) Under-represented GO terms related to catabolic processes. (B) Under-represented GO terms related to enzymatic and structural processes.

(A)

| Functional group                                 | Percentage of genes in the group | P-value |
|--------------------------------------------------|----------------------------------|---------|
| Modification dependent protein catabolic process | 98.5                             | 2.8E-92 |
| Macromolecule catabolic process                  | 98.5                             | 2.8E-92 |
| Cellular protein catabolic process               | 98.5                             | 5.1E-92 |
| Ubl conjugation pathway                          | 81.8                             | 6.5E-90 |
| Proteolysis                                      | 98.5                             | 6.8E-74 |
| Ubiquitin-protein ligase activity                | 59.1                             | 3.5E-53 |
| Amino-acid ligase activity                       | 59.1                             | 2.3E-51 |
| Ubiquitin-ligase-complex                         | 37.9                             | 9.2E-23 |
| U box domain                                     | 25.8                             | 1.9E-27 |
| Protein ubiquitination                           | 28.8                             | 3.0E-22 |

(B)

| Functional group                 | Percentage of genes in the group | P-value |
|----------------------------------|----------------------------------|---------|
| Glycoside hydrolase              | 65.7                             | 9.8E-40 |
| Glycosidase                      | 60.0                             | 2.3E-33 |
| Signaling pathway                | 57.1                             | 9.0E-18 |
| Glycoprotein                     | 48.6                             | 6.2E-16 |
| Related to extra cellular region | 48.6                             | 6.5E-9  |
| Cation binding                   | 65.7                             | 1.1E-7  |
| Cell wall                        | 31.4                             | 1.4E-6  |
| External encapsulating structure | 31.4                             | 1.6E-6  |
| Apoplast                         | 22.9                             | 3.4E-6  |
| Cell wall biogenesis/degradation | 17.1                             | 8.5E-6  |



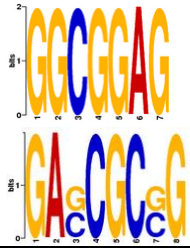

7.8e+003

GO  
unknown

2.4e+004

GO  
unkonwn

**Supplementary Table 5:** Searches performed for all pairs of species in the study. The searches were performed with the same cut off e-value for lineage specific CNSs. The best hits were selected and concatenated when determining CNSs common for each lineage in the common ancestor.

| Search                | Number of CNSs |
|-----------------------|----------------|
| Arabidopsis-Brassica  | 57132          |
| Ricinus-Populus       | 30355          |
| Cucumis-Ricinus       | 4983           |
| Cucumis-Populus       | 4007           |
| Vitis-Cucumis         | 2581           |
| Vitis-Populus         | 7109           |
| Vitis-Ricinus         | 5479           |
| Vitis-Brassica        | 2534           |
| Vitis-Arabidopsis     | 945            |
| Aquilegia-Vitis       | 3241           |
| Aquilegia-Cucumis     | 1603           |
| Aquilegia-Populus     | 2488           |
| Aquilegia-Ricinus     | 2729           |
| Aquilegia-Brassica    | 2169           |
| Aquilegia-Arabidopsis | 834            |
| Arabidopsis-Ricinus   | 1370           |
| Arabidopsis-Populus   | 1410           |
| Arabidopsis-Cucumis   | 778            |
| Brassica-Ricinus      | 9981           |
| Brassica-Populus      | 8150           |
| Brassica-Cucumis      | 3598           |
| Cucumis-Ricinus       | 4983           |
| Cucumis-Populus       | 4007           |
| Setaria-Sorghum       | 30134          |
| Oryza-Brachypodium    | 20323          |
| Setaria-Brachypodium  | 17386          |
| Setaria-Oryza         | 21717          |
| Sorghum-Brachypodium  | 14723          |
| Sorghum-Oryza         | 18029          |
| Musa-Brachypodium     | 1693           |
| Musa-Oryza            | 2278           |
| Musa-Sorghum          | 830            |
| Musa-Setaria          | 2132           |
| Musa-Brassica         | 4045           |
| Musa-Ricinus          | 6321           |
| Musa-Populus          | 3345           |

|                            |      |
|----------------------------|------|
| Musa-Cucumis               | 1474 |
| Musa-Vitis                 | 3177 |
| Musa-Aquilegia             | 496  |
| Musa-Arabidopsis           | 1412 |
| Oryza-Arabidopsis          | 608  |
| Oryza-Brassica             | 1164 |
| Oryza-Ricinus              | 1194 |
| Oryza-Populus              | 1250 |
| Oryza-Cucumis              | 833  |
| Oryza-Vitis                | 1133 |
| Oryza-Aquilegia            | 932  |
| Brachypodium-Arabidopsis   | 488  |
| Brachypodium-Brassica      | 960  |
| Brachypodium-Ricinus       | 767  |
| Brachypodium-Populus       | 821  |
| Brachypodium-Cucumis       | 647  |
| Brachypodium-Vitis         | 807  |
| Brachypodium-Aquilegia     | 616  |
| Sorghum-Arabidopsis        | 599  |
| Sorghum-Brassica           | 1339 |
| Sorghum-Ricinus            | 1412 |
| Sorghum-Populus            | 1351 |
| Sorghum-Cucumis            | 824  |
| Sorghum-Vitis              | 1019 |
| Sorghum-Aquilegia          | 866  |
| Setaria-Arabidopsis        | 595  |
| Setaria-Brassica           | 1498 |
| Setaria-Ricinus            | 1252 |
| Setaria-Populus            | 1004 |
| Setaria-Cucumis            | 962  |
| Setaria-Vitis              | 1275 |
| Setaria-Aquilegia          | 1181 |
| Selaginella-Arabidopsis    | 651  |
| Selaginella-Brassica       | 2081 |
| Selaginella-Ricinus        | 2649 |
| Selaginella-Populus        | 1780 |
| Selaginella-Cucumis        | 557  |
| Selaginella-Vitis          | 670  |
| Selaginella-Aquilegia      | 595  |
| Selaginella-Setaria        | 696  |
| Selaginella-Sorghum        | 909  |
| Selaginella-Brachypodium   | 591  |
| Selaginella-Oryza          | 766  |
| Selaginella-Musa           | 3291 |
| Physcomitrella-Arabidopsis | 3322 |
| Physcomitrella-Brassica    | 3241 |

---

|                                                                                                                                                                            |              |
|----------------------------------------------------------------------------------------------------------------------------------------------------------------------------|--------------|
| Physcomitrella-Ricinus                                                                                                                                                     | 1256         |
| Physcomitrella-Populus                                                                                                                                                     | 2345         |
| Physcomitrella-Cucumis                                                                                                                                                     | 1488         |
| Physcomitrella-Vitis                                                                                                                                                       | 3021         |
| Physcomitrella-Aquilegia                                                                                                                                                   | 787          |
| Physcomitrella-Setaria                                                                                                                                                     | 421          |
| Physcomitrella-Sorghum                                                                                                                                                     | 2968         |
| Physcomitrella-Brachypodium                                                                                                                                                | 739          |
| Physcomitrella-Oryza                                                                                                                                                       | 1583         |
| Physcomitrella-Musa                                                                                                                                                        | 3332         |
| Physcomitrella-Selaginella                                                                                                                                                 | 5584         |
| Chlamydomonas-Arabidopsis                                                                                                                                                  | 100          |
| Chlamydomonas-Brassica                                                                                                                                                     | 225          |
| Chlamydomonas-Ricinus                                                                                                                                                      | 330          |
| Chlamydomonas-Populus                                                                                                                                                      | 355          |
| Chlamydomonas-Cucumis                                                                                                                                                      | 119          |
| Chlamydomonas-Vitis                                                                                                                                                        | 93           |
| Chlamydomonas-Aquilegia                                                                                                                                                    | 112          |
| Chlamydomonas-Setaria                                                                                                                                                      | 178          |
| Chlamydomonas-Sorghum                                                                                                                                                      | 564          |
| Chlamydomonas-Brachypodium                                                                                                                                                 | 438          |
| Chlamydomonas-Oryza                                                                                                                                                        | 706          |
| Chlamydomonas-Musa                                                                                                                                                         | 713          |
| Chlamydomonas-Selaginella                                                                                                                                                  | 747          |
| Chlamydomonas-Physcomitrella                                                                                                                                               | 519          |
| Setaria-Sorghum-Brachypodium-Oryza ( <b>Grasses</b> )                                                                                                                      | <b>54353</b> |
| Setaria-Sorghum-Brachypodium-Oryza-Musa<br>( <b>Monocots</b> )                                                                                                             | <b>6934</b>  |
| Arabidopsis-Brassica-Ricinus-Populus-Cucumis                                                                                                                               | 19654        |
| Arabidopsis-Brassica-Ricinus-Populus-Cucumis-Vitis                                                                                                                         | 12823        |
| Arabidopsis-Brassica-Ricinus-Populus-Cucumis-Vitis-<br>Aquilegia ( <b>Eudicots</b> )                                                                                       | <b>7766</b>  |
| Arabidopsis-Brassica-Ricinus-Populus-Cucumis-Vitis-<br>Aquilegia-Setaria-Sorghum-Brachypodium-Oryza-<br>Musa-Selaginella ( <b>Vascular plants</b> )                        | <b>8725</b>  |
| Arabidopsis-Brassica-Ricinus-Populus-Cucumis-Vitis-<br>Aquilegia-Setaria-Sorghum-Brachypodium-Oryza-<br>Musa-Selaginella-Physcomitrella ( <b>Land plants</b> )             | <b>10820</b> |
| Arabidopsis-Brassica-Ricinus-Populus-Cucumis-Vitis-<br>Aquilegia-Setaria-Sorghum-Brachypodium-Oryza-<br>Musa-Selaginella-Physcomitrella-Chlamydomonas<br>( <b>plants</b> ) | <b>3246</b>  |

---
